# Supplementary material for: Strontium delivery on topographical titanium to enhance bioactivity and osseointegration in osteoporotic rats
Source: Royal Society of Chemistry journal article supplement (doi:10.1039/c5tb00128e), 2015-01-01
Supplement: c5tb00128e1.pdf [file c5tb00128e1.pdf]

## Supplementary information

### **Strontium delivery on topographical titanium to enhance bioactivity and osseointegration in osteoporotic rats**

Jin Wen<sup>a, b,1</sup>, Jinhua Li<sup>c,1</sup>, Hongya Pan<sup>b</sup>, Wenjie Zhang<sup>a,b</sup>, Deliang Zeng<sup>a,b</sup>, Lianyi Xu<sup>a,b</sup>, Qianju Wu<sup>a,b</sup>, Xiuli Zhang<sup>b</sup>, Xuanyong Liu<sup>c,\*</sup> and Xinquan Jiang<sup>a,b,\*</sup>

<sup>a</sup> Department of Prosthodontics, Ninth People's Hospital affiliated to Shanghai Jiao Tong University, School of Medicine, 639 Zhizaoju Road, Shanghai 200011, China.

<sup>b</sup> Oral Bioengineering Lab, Shanghai Research Institute of Stomatology, Ninth People's Hospital Affiliated to Shanghai Jiao Tong University, School of Medicine, Shanghai Key Laboratory of Stomatology, 639 Zhizaoju Road, Shanghai 200011, China.

<sup>c</sup> State Key Laboratory of High Performance Ceramics and Superfine Microstructure, Shanghai Institute of Ceramics, Chinese Academy of Sciences, Shanghai 200050, China.

#### **Corresponding Authors:**

Prof. Xinquan Jiang

Department of Prosthodontics, Ninth People's Hospital affiliated to Shanghai Jiao Tong University, School of Medicine, 639 Zhizaoju Road, Shanghai 200011, China.

E-mail: [xinquanj@aliyun.cn](mailto:xinquanj@aliyun.cn)

Tel.: +86 21 63135412. Fax: +86 21 63136856.

Prof. Xuanyong Liu

State Key Laboratory of High Performance Ceramics and Superfine Microstructure, Shanghai

Institute of Ceramics, Chinese Academy of Sciences, Shanghai 200050, China.

E-mail: [xyliu@mail.sic.ac.cn](mailto:xyliu@mail.sic.ac.cn)

Tel.: +86 21 52412409. Fax: +86 21 52412409.

<sup>1</sup> These authors contributed equally to this work.

## **Culture and differentiation of THP-1 cells**

THP-1 cells are a human acute monocytic leukemia cell line, which originated from the peripheral blood of a human male with acute monocytic leukemia in the 1980s. This cell line is often chosen over the other cells in the field for studying osteoclasts, not only because it is a monocytic model that retains the functional properties of PBMC, but also because it is a human cell line.<sup>1-3</sup>

The cell lines obtained from American Type Culture Collection (ATCC, maintained by cell bank of Chinese Academy of Sciences) were cultured in dishes with RPMI 1640 (GIBCO 11875-093) containing 10 % fetal bovine serum (FBS) (Hyclone, USA) and 10 mM HEPES at 37 °C in a humidified atmosphere of 95% air and 5% CO<sub>2</sub>. To initiate differentiation, the cells were each plated onto the titanium samples. Four hours after adding 50 ng/ml PMA (Sigma, USA), non-adherent cells were discarded and adherent cells were cultured in the presence of 20 ng/ml M-CSF (PeproTech, USA), 50 ng/ml RANKL (PeproTech, USA) and 10<sup>-7</sup> mol/L Vitamin D3 (Sigma, USA) until osteoclasts appeared. After five days, the cells on the titanium were harvested for further experiments. The cells also underwent the same procedures in 24-well plates, replacing the medium with different titanium extracts. The cells in the regular induction process were the control group, and the cells with pure medium were regarded as the blank group.

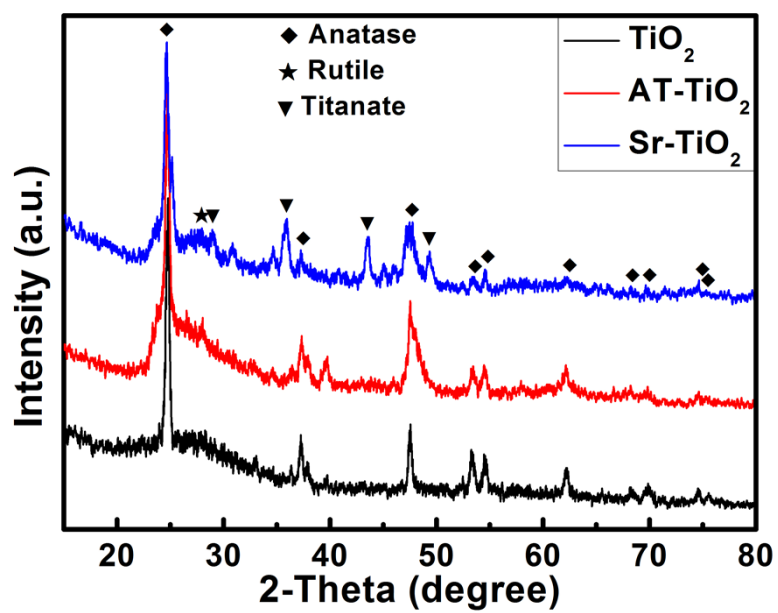

**Supplementary Figure S1:** Surface phase compositions of samples  $\text{TiO}_2$ ,  $\text{AT-TiO}_2$ , and  $\text{Sr-TiO}_2$  examined by XRD.

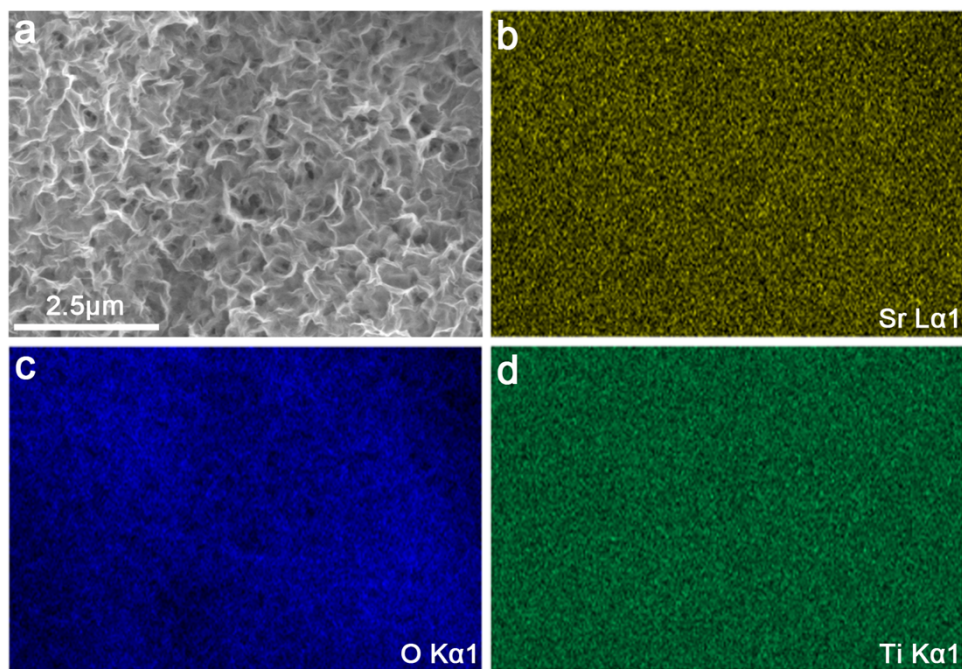

**Supplementary Figure S2:** Energy-dispersive X-ray spectrometric (EDS) mapping results for Sr-TiO<sub>2</sub> group, showing the homogeneous distribution of Sr (**b**), O (**c**) and Ti (**d**) elements on the corresponding region (**a**).

## Notes and references

1. S. Tsuchiya, M. Yamabe, Y. Yamaguchi, Y. Kobayashi, T. Konno and K. Tada, *International Journal of Cancer*, 1980, **26**, 171-176.
2. O. González, R. L. Smith and S. B. Goodman, *Journal of Biomedical Materials Research*, 1996, **30**, 463-473.
3. M. Auger and J. Ross, in *The macrophage*, eds. C. Lewis and J. McGee, Oxford University Press, Oxford, UK, 1992, pp. 3-74.
